# Supplementary material for: Association of Premorbid GLP-1RA and SGLT-2i Prescription Alone and in Combination with COVID-19 Severity
Source: Springer Nature journal article supplement (doi:10.1007/s13300-024-01562-1), 2024-03-27
Supplement: MOESM1 [file 26896798]

## **SUPPLEMENTARY MATERIAL**

# **Association of premorbid GLP-1RA and SGLT-2i prescription alone and in combination with COVID-19 Severity**

### **Authors**

Klara R. Klein<sup>1</sup>, Trine J. Abrahamsen<sup>2</sup>, Anna R. Kahkoska<sup>1,3</sup>, G. Caleb Alexander<sup>4,5,6</sup>,  
Christopher G. Chute<sup>7</sup>, Melissa Haendel<sup>8</sup>, Stephanie S. Hong<sup>6</sup>, Hemalkumar Mehta<sup>5</sup>,  
Richard Moffitt<sup>9</sup>, Til Stürmer<sup>10</sup>, Kajsa Kvist<sup>2</sup>, John B. Buse<sup>1</sup> on behalf of the N3C  
consortium

### **Affiliations**

<sup>1</sup>Division of Endocrinology and Metabolism, Department of Medicine, University of North  
Carolina School of Medicine, Chapel Hill, North Carolina, USA

<sup>2</sup>Trine Julie Abrahamsen, PhD: Novo Nordisk A/S, Søborg, Denmark

<sup>3</sup>Department of Nutrition, Gillings School of Global Public Health, University of North  
Carolina at Chapel Hill

<sup>4</sup>Center for Drug Safety and Effectiveness, Johns Hopkins Bloomberg School of Public  
Health, Baltimore, MD

<sup>5</sup>Department of Epidemiology, Johns Hopkins, Bloomberg School of Public Health,  
Baltimore, MD

<sup>6</sup>Division of General Internal Medicine, Johns Hopkins Medicine, Baltimore, MD

<sup>7</sup>Schools of Medicine, Public Health, and Nursing; Johns Hopkins University, Baltimore, MD 21287

<sup>8</sup>Center for Health AI, University of Colorado School of Medicine, Aurora, CO

<sup>9</sup> Department of Biomedical Informatics, Stony Brook University, Stony Brook, NY

<sup>10</sup>Department of Epidemiology, Gillings School of Global Public Health, University of North Carolina at Chapel Hill, Chapel Hill, NC

### **Corresponding Author**

Klara R. Klein, Division of Endocrinology and Metabolism, Campus Box #7172, 8072 Burnett Womack, 160 Dental Circle, Chapel Hill NC 27599, Tel: (919)-966-0134, Fax (919)-966-6025, E-mail: [klara\\_klein@med.unc.edu](mailto:klara_klein@med.unc.edu)

**TABLES:**

**Supplementary Table S1.** Crude primary and secondary outcomes, according to premorbid medication use of GLP-1RA, SGLT-2i, and DPP-4i.

| <b>Outcome</b>                                                    | <b>All<br/>(N =<br/>78,806)</b> | <b>GLP-1RA<br/>(N = 42,799)</b> | <b>SGLT-2i<br/>(N = 25,421)</b> | <b>DPP-4i<br/>(N =<br/>20,200)</b> |
|-------------------------------------------------------------------|---------------------------------|---------------------------------|---------------------------------|------------------------------------|
| 60-day mortality*<br>– E (%)                                      | 3,070 (3.90)                    | 1,148 (2.68)                    | 756 (2.97)                      | 1,413 (7.00)                       |
| Emergency room visit‡<br>– E (%)                                  | 23,366<br>(29.65)               | 11,503<br>(26.88)               | 7,279<br>(28.63)                | 7,205<br>(35.67)                   |
| Hospitalization‡<br>– E (%)                                       | 18,109<br>(22.98)               | 7,975 (18.63)                   | 5,556<br>(21.86)                | 6,425<br>(31.81)                   |
| Mechanical ventilation<br>(Intubation or<br>ventilation)‡ – E (%) | 3,318 (4.21)                    | 1,619 (3.78)                    | 1,083 (4.26)                    | 991 (4.91)                         |

\* Within 60 days after positive SARS-CoV-2 test, ‡ Within 14 days after a positive

SARS-CoV-2 test, N: Total number of individuals, E: number of outcome events (first event only), %: proportion of individuals with the outcome

Abbreviations: DPP-4i, dipeptidyl peptidase-4 inhibitor; GLP-1RA, glucagon-like peptide 1 receptor agonist; SGLT-2i, sodium glucose co-transporter 2 inhibitor

**Supplementary Table S2.** Odds ratios in age-restricted cohort for 60-day mortality and secondary outcomes for use of GLP-1RA vs. DPP-4i and use of SGLT-2i vs. DPP-4i<sup>#</sup>.

| <b>Outcome</b>                                                     | <b>Model</b> | <b>GLP-1RA vs DPP-4i<br/>OR (95% CI)</b> | <b>SGLT-2i vs DPP-4i<br/>OR (95% CI)</b> |
|--------------------------------------------------------------------|--------------|------------------------------------------|------------------------------------------|
| 60-day mortality*                                                  | TMLE         | 0.64 (0.59-0.69)                         | 0.57 (0.52-0.63)                         |
|                                                                    | IPTW         | 0.64 (0.59-0.70)                         | 0.53 (0.49-0.58)                         |
| Emergency room visit <sup>‡</sup>                                  | TMLE         | 0.78 (0.75-0.81)                         | 0.80 (0.77-0.84)                         |
|                                                                    | IPTW         | 0.79 (0.76-0.82)                         | 0.80 (0.77-0.83)                         |
| Hospitalization <sup>‡</sup>                                       | TMLE         | 0.70 (0.67-0.73)                         | 0.74 (0.71-0.77)                         |
|                                                                    | IPTW         | 0.69 (0.67-0.72)                         | 0.72 (0.69-0.75)                         |
| Mechanical ventilation<br>(Intubation or ventilation) <sup>‡</sup> | TMLE         | 1.01 (0.92-1.10)                         | 0.99 (0.90-1.08)                         |
|                                                                    | IPTW         | 1.02 (0.94-1.12)                         | 0.97 (0.89-1.06)                         |

<sup>#</sup> The age-restricted cohort included only individuals aged 45–80 years (33,579 GLP-1RA users, 21,625 SGLT-2i users, and 16,503 DPP-4i users).

\* Within 60 days after positive SARS-CoV-2 test, <sup>‡</sup> Within 14 days after a positive SARS-CoV-2 test

Abbreviations: DPP-4i, dipeptidyl peptidase-4 inhibitor; GLP-1RA, glucagon-like peptide 1 receptor agonist; IPTW, inverse probability treatment weighted; OR, odds ratio; SGLT-2i, sodium glucose co-transporter 2 inhibitor; TMLE, targeted maximum likelihood estimation

**Supplementary Table S3.** Odds ratios in eGFR-restricted cohort for 60-day mortality and secondary outcomes for use of GLP-1RA vs. DPP-4i and use of SGLT-2i vs. DPP-4i#.

| <b>Outcome</b>                                         | <b>Model</b> | <b>GLP-1RA vs DPP-4i<br/>OR (95% CI)</b> | <b>SGLT-2i vs DPP-4i<br/>OR (95% CI)</b> |
|--------------------------------------------------------|--------------|------------------------------------------|------------------------------------------|
| 60-day mortality*                                      | TMLE         | 0.58 (0.49 - 0.69)                       | 0.59 (0.53 - 0.67)                       |
|                                                        | IPTW         | 0.60 (0.53 - 0.68)                       | 0.53 (0.47 - 0.59)                       |
| Emergency room visit‡                                  | TMLE         | 0.80 (0.75 - 0.86)                       | 0.86 (0.82 - 0.90)                       |
|                                                        | IPTW         | 0.79 (0.76 - 0.83)                       | 0.83 (0.79 - 0.87)                       |
| Hospitalization‡                                       | TMLE         | 0.67 (0.62 - 0.72)                       | 0.76 (0.72 - 0.80)                       |
|                                                        | IPTW         | 0.69 (0.65 - 0.72)                       | 0.73 (0.70 - 0.77)                       |
| Mechanical ventilation<br>(Intubation or ventilation)‡ | TMLE         | 0.80 (0.64 - 1.00)                       | 0.89 (0.79 - 1.01)                       |
|                                                        | IPTW         | 0.80 (0.71 - 0.89)                       | 0.88 (0.78 - 0.98)                       |

# The eGFR-restricted cohort included only individuals with eGFR  $\geq$  45 mL/min (38,730 GLP-1RA users, 23,128 SGLT-2i users, and 16,172 DPP-4i users).

\* Within 60 days after positive SARS-CoV-2 test, ‡ Within 14 days after a positive SARS-CoV-2 test

Abbreviations: DPP-4i, dipeptidyl peptidase-4 inhibitor; GLP-1RA, glucagon-like peptide 1 receptor agonist; IPTW, inverse probability treatment weighted; OR, odds ratio; SGLT-2i, sodium glucose co-transporter 2 inhibitor; TMLE, targeted maximum likelihood estimation

**Supplementary Table S4.** Odds ratios adjusted for age and sex (sensitivity analysis using a simple model) for 60-day mortality and secondary outcomes for use of GLP-1RA vs. DPP-4i and use of SGLT-2i vs. DPP-4i.

| <b>Outcome</b>                                                     | <b>Model</b> | <b>GLP-1RA vs DPP-4i<br/>OR (95% CI)</b> | <b>SGLT-2i vs DPP-4i<br/>OR (95% CI)</b> |
|--------------------------------------------------------------------|--------------|------------------------------------------|------------------------------------------|
| 60-day mortality*                                                  | TMLE         | 0.64 (0.59 - 0.69)                       | 0.57 (0.52 - 0.63)                       |
|                                                                    | IPTW         | 0.64 (0.59 - 0.70)                       | 0.53 (0.49 - 0.58)                       |
| Emergency room visit <sup>‡</sup>                                  | TMLE         | 0.78 (0.75 - 0.81)                       | 0.80 (0.77 - 0.84)                       |
|                                                                    | IPTW         | 0.79 (0.76 - 0.82)                       | 0.80 (0.77 - 0.83)                       |
| Hospitalization <sup>‡</sup>                                       | TMLE         | 0.70 (0.67 - 0.73)                       | 0.74 (0.71 - 0.77)                       |
|                                                                    | IPTW         | 0.69 (0.67 - 0.72)                       | 0.72 (0.69 - 0.75)                       |
| Mechanical ventilation<br>(Intubation or ventilation) <sup>‡</sup> | TMLE         | 1.01 (0.92 - 1.10)                       | 0.99 (0.90 - 1.08)                       |
|                                                                    | IPTW         | 1.02 (0.94 - 1.12)                       | 0.97 (0.89 - 1.06)                       |

\* Within 60 days after positive SARS-CoV-2 test, <sup>‡</sup> Within 14 days after a positive

SARS-CoV-2 test

Abbreviations: DPP-4i, dipeptidyl peptidase-4 inhibitor; GLP-1RA, glucagon-like peptide 1 receptor agonist; IPTW, inverse probability treatment weighted; OR, odds ratio; SGLT-2i, sodium glucose co-transporter 2 inhibitor; TMLE, targeted maximum likelihood estimation

**Supplementary Table S5.** Crude primary and secondary outcomes, according to premorbid medication use of GLP-1RA mono, SGLT-2i mono, and GLP-1RA/ SGLT-2i.

| <b>Outcome</b>                                                             | <b>GLP-1RA<br/>mono<br/>(N = 36,942)</b> | <b>SGLT-2i<br/>mono<br/>(N = 20,656)</b> | <b>GLP-1RA/<br/>SGLT-2i<br/>(N = 11,594)</b> |
|----------------------------------------------------------------------------|------------------------------------------|------------------------------------------|----------------------------------------------|
| 60-day mortality* – E (%)                                                  | 1,044 (2.83)                             | 669 (3.24)                               | 299 (2.58)                                   |
| Emergency room visit <sup>‡</sup> – E (%)                                  | 10,040 (27.18)                           | 6,054<br>(29.31)                         | 3,193 (27.54)                                |
| Hospitalization <sup>‡</sup> – E (%)                                       | 7,029 (19.03)                            | 4,777<br>(23.13)                         | 2,258 (19.48)                                |
| Mechanical ventilation<br>(Intubation or ventilation) <sup>‡</sup> – E (%) | 1,393 (3.77)                             | 884 (4.28)                               | 447 (3.86)                                   |

\* Within 60 days after positive SARS-CoV-2 test, <sup>‡</sup> Within 14 days after a positive SARS-CoV-2 test; N: Total number of individuals; E: number of outcome events (first event only), %: proportion of individuals with the outcome

Abbreviations: DPP-4i, dipeptidyl peptidase-4 inhibitor; GLP-1RA, glucagon-like peptide 1 receptor agonist; SGLT-2i, sodium glucose co-transporter 2 inhibitor

## FIGURES

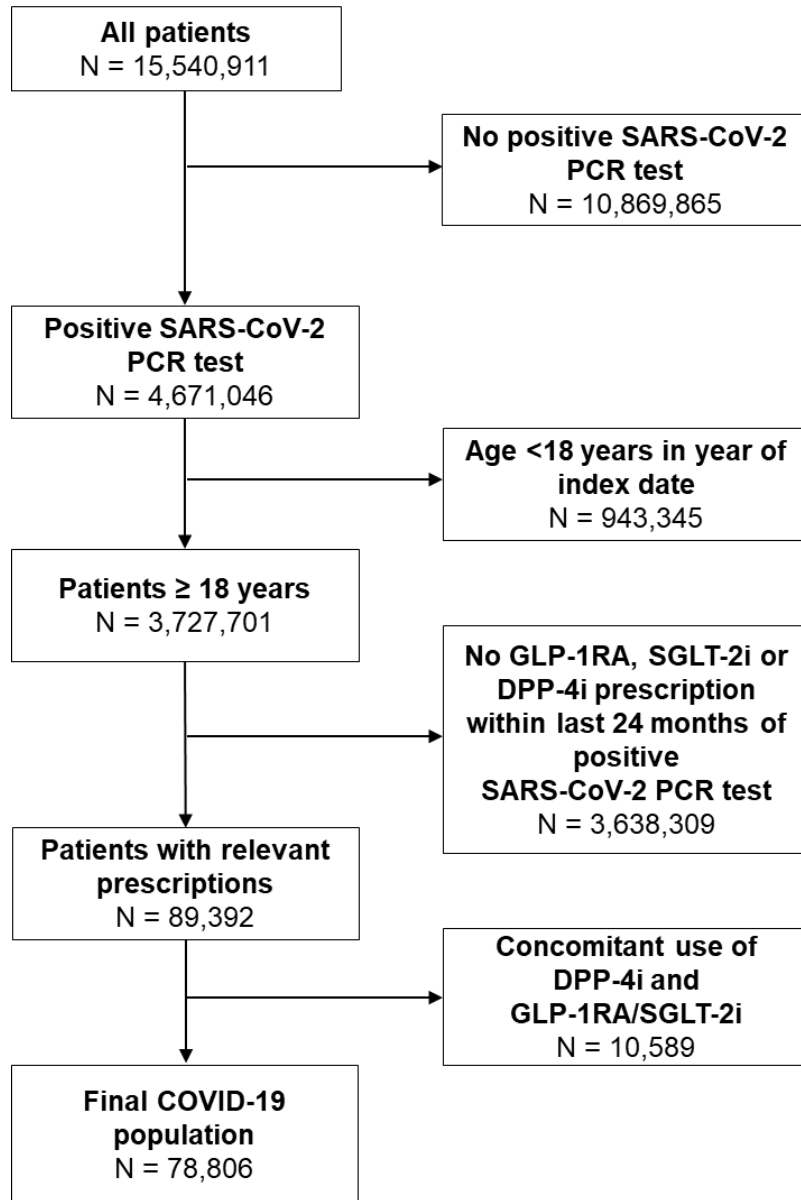

### Supplementary Figure S1. Overview of study population

Abbreviations: COVID-19, coronavirus disease 2019; DPP-4i, dipeptidyl peptidase-4 inhibitor; GLP-1RA, glucagon-like peptide 1 receptor agonist; PCR, polymerase chain reaction; SARS-CoV-2, severe acute respiratory syndrome coronavirus 2; SGLT-2i, sodium glucose co-transporter 2



**A**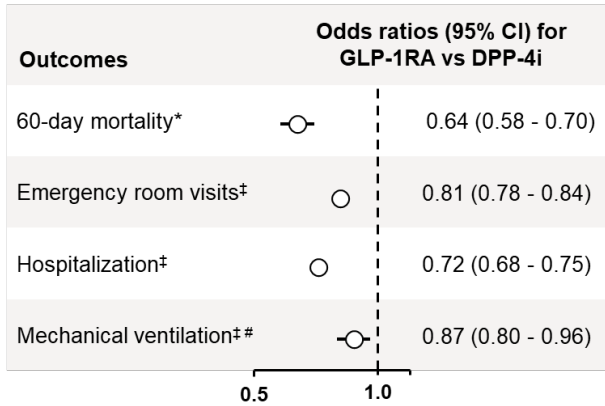**B**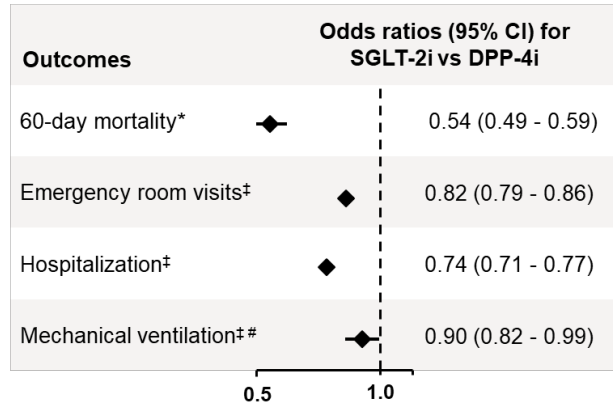

**Supplementary Figure S2.** Forest plot depicting IPTW-estimated ORs for primary and secondary outcomes for patients with a COVID-19 diagnosis and prescription for GLP-1RA (A) and SGLT-2i (B) use compared with DPP-4i use, respectively.

\* Within 60 days after positive SARS-CoV-2 test, ‡ Within 14 days after positive SARS-CoV-2 test, # Mechanical ventilation (intubation or ventilation)

Abbreviations: DPP-4i, dipeptidyl peptidase-4 inhibitor; GLP-1RA, glucagon-like peptide 1 receptor agonist; IPTW, inverse probability treatment weighted; OR, odds ratio; SGLT-2i, sodium glucose co-transporter 2 inhibitor

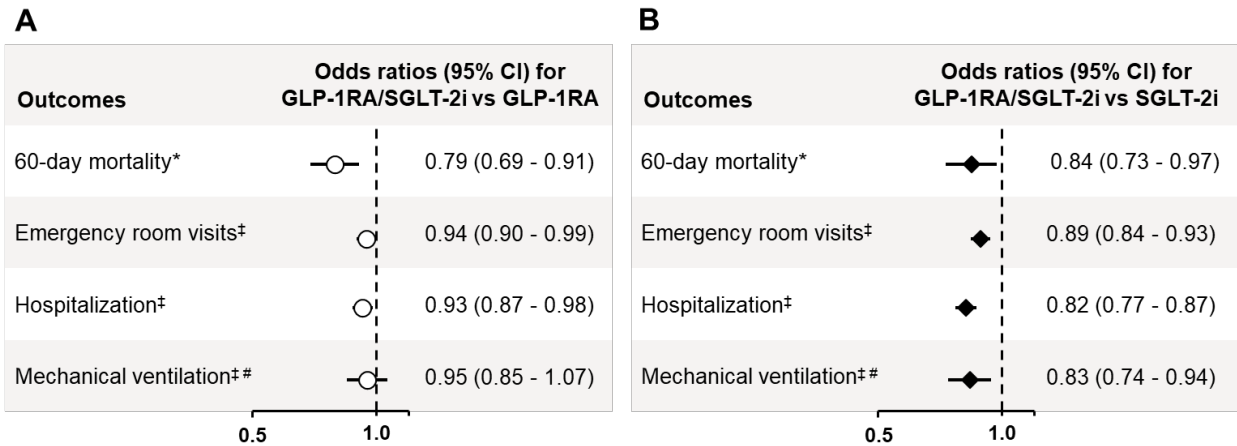

**Supplementary Figure S3.** Forest plot depicting IPTW-estimated ORs for primary and secondary outcomes for patients with a COVID-19 diagnosis and prescription for GLP-1RA and SGLT-2i combined use compared with GLP-1RA (A) and SGLT-2i (B) single use, respectively.

\* Within 60 days after positive SARS-CoV-2 test, <sup>‡</sup> Within 14 days after positive SARS-CoV-2 test, # Mechanical ventilation (intubation or ventilation)

Abbreviations: DPP-4i, dipeptidyl peptidase-4 inhibitor; GLP-1RA, glucagon-like peptide 1 receptor agonist; IPTW, inverse probability treatment weighted; OR, odds ratio; SGLT-2i, sodium glucose co-transporter 2 inhibitor
